# Supplementary material
Source: publisher figshare collection journal article supplement (https://tandf.figshare.com/ndownloader/files/22788287)
Supplement: Supplementary file 1 [file 22788287]

**Supplemental Material**

**List of sentences used in the experiment in Spanish and below in English**

| **Neutral** | |
| --- | --- |
| Él se despidió de ella  [He said goodbye to her] | Él le escribió una nota a ella  [He wrote a note to her] |
| Él le dijo la hora a ella  [He told her the time] | Él le avisó que llegaría atrasado a ella  [He told her he was late] |
| Él actuó tranquilamente con ella  [He acted calmly with her] | Él le pasó la fotografía a ella  [He passed her the photo] |
| Él le mostró la canción a ella  [He showed her the song] | He dijo que tenía sueño a ella  [He told her he was tired] |
| Él le habló del trabajo a ella  [He talked to her about his job] | Él le dijo lo que pensaba a ella  [He told her what he was thinking] |
| Él le dio azúcar a ella  [He gave her some sugar] | Él le acercó el asiento a ella  [He moved the chair closer to her] |
| Él le pasó un objeto a ella  [He passed her un object] | Él la miró a los ojos  [He looked her in the eyes] |
| Él le mostró su cuaderno a ella  [He showed her his notebook] | Él le recordó la lista a ella  [He reminded her the list] |
| Él le dejó un recordatorio a ella  [He left her a reminder] | Él le mandó un mensaje a ella  [He sent her a message] |
| Él le imprimió la carta a ella  [He printed her the letter] | Él le escribió la dirección a ella  [He wrote her the address] |
| Él le dejó un mensaje de voz a ella  [He left her a voicemail] | Él le abrió la puerta del taxi a ella  [He opened her the taxi door] |
| Él le pasó una manzana a ella  [He passed her an apple] | Él la llamó por teléfono  [He phoned her] |
| Él la llevó al parque  [He took her to the park] | Él le pasó los zapatos a ella  [He passed her the shoes] |
| Él le mostró la guitarra a ella  [He showed her the guitar] | Él le pasó la cuchara a ella  [He passed her the spoon] |
| Él le prestó el diario a ella  [He lent her the diary] | Él le pasó la chaqueta a ella  [He passed her the jacket] |
| Él e mostró un cuadro a ella  [He showed her a painting] | Él se sentó al lado de ella  [He sat beside her] |
| Él le pasó la mochila a ella  [He passed her the backpack] | Él le pasó un cinturón a ella  [He gave her a belt] |
| Él le habló con honestidad a ella  [He talked to her honestly] | Él la recogió en taxi a ella  [He picked her up in a taxi] |
| Él le pasó la toalla a ella  [He passed her the towel] | Él le hizo una promesa a ella  [He made a promise to her] |
| Él le presentó a un compañero a ella  [He introduced her a partner] | Él le dijo a ella que abriera la ventana  [He told her to open the window] |
| Él le pasó un vaso a ella  [He passed her a glass] | Él se acercó a ella  [He moved closer to her] |
| Él le pasó las entradas a ella  [He passed her the tickets] | Él le escribió un mail a ella  [He wrote an e-mail to her] |
| Él salió con ella a comprar  [He went shopping with her] | Él le dijo a ella que fueran juntos  [He told her to go together] |
| Él le llevó libros a ella  [He brought her books] | Él le habló de su pasado a ella  [He told to her about his past] |
| Él le habló por chat a ella  [He chatted to her] | Él se acordó de ella  [He remembered her] |
| Él le pasó la silla a ella  [He passed her the chair] | Él la llevó al metro  [He took her to the subway] |
| Él le dió un vaso de agua a ella  [He gave her a glass of water] | Él la llevó a casa  [He took her home] |
| Él le pidió a ella que cerrara la puerta  [He asked her to close the door] | Él le pidió a ella que lo esperara  [He asked her to wait for him] |
| Él le tocó la puerta a ella  [He knocked at her door] | Él le abrió la puerta a ella  [He opened the door to her] |
| Él la invitó a salir con sus amigos  [He invited her to go out with his friends] | Él le envió un sms  [He sent her a sms] |
| **Violent** | |
| Él le tiró algo peligroso a ella  [He threw her something dangerous] | Él le dijo a ella que no hace nada bien  [He told her she couldn’t do anything right] |
| Él la amenazó con golpearla  [He threatened her with hitting her] | Él le dijo a ella que ella es mala amante  [He told her she was a bad lover] |
| Él le pegó a ella con la mano  [He hit her with his hand] | Él la siguió para saber con quién estaba  [He followed her to know where and with who she was] |
| Él actuó como si quisiera matarla  [He acted as he wanted to kill her] | Él le gritó a ella  [He yelled at her] |
| Él le pegó a ella en la cabeza  [He hit her in the head] | Él no quiso que ella se juntara con sus amigas  [He didn’t want her to go out with her friends] |
| Él le lanzó un objeto a ella  [He threw an object] | Él le dijo idiota a ella  [He called her a idiot] |
| Él la amenazó con un cuchillo a ella  [He threatened her with a knife] | Él la menospreció  [He scorned her] |
| Él la amenazó con un cuchillo  [He threatened her with a knife] | Él trató de poner a sus amigos en contra de ella  [He tried to turn their friends against her] |
| Él la golpeó con un objeto  [He hit her with an object] | Él la insultó  [He insulted her] |
| Él le dió una patada a ella  [He gave her a kick] | Él rompió las cosas de ella  [He broke her things] |
| Él la abofeteó  [He slapped her] | Él la amenazó con destrozar algo que ella valora  [He threatened her with breaking something she values] |
| Él le pegó a ella con un cinturón  [He hit her with a belt | Él le tiró a ella el pelo  [He pulled her hair |
| Él le retorció el brazo a ella  [He twisted her arm] | Él le dijo que ella no vale para nada  [He told her she is worthless] |
| Él la amenazó con un arma  [He threatened her with a weapon] | Él se burló de ella en público  [He made fun of her in public] |
| Él le pegó a ella  [He hit her] | Él la ridiculizó en público  [He mocked her in public] |
| Él le hizo una quemadura a propósito  [He made her a burn in purpose] | Él la zarandeó  [He shook her] |
| Él la amenazó con una pistola  [He threatened her with a gun] | Él la avergonzó en público  [He ashamed her in public] |
| Él la golpeó  [He hit her] | Él la empujó  [He shoved her] |
| Él le cortó con un cuchillo a ella  [He cut her with a knife] | La amenazó con arrojarle algo  [He threatened her with throwing something to her] |
| Él le pegó con un palo a ella  [He hit her with a stick] | Él la humilló en público  [He humiliated her in public] |
| Él le dio puñetazos a ella  [He punched her | Él la agarró por el cuello  [He grabbed her by the neck] |
| Él usó un cuchillo contra ella  [He used a knife against her | Él la insultó despectivamente  [He insulted her pejoratively] |
| Él la hirió con una navaja  [He hurt her with a razor] | Él la amenazó con lanzarle algo a ella  [He threatened her with throwing her something] |
| Él le pegó a ella con el puño  [He hit her with his fist] | Él destrozó algo que a ella valora  [He smashed something that she values] |
| Él la amenazó con matarla  [He threatened her with killing her] | Él la empujó a propósito  [He shoved her on purpose] |
| Él le dio una paliza a ella  [He gave her a beating] | Él la tomó y la sacudió  [He took her and shook her] |
| Él trató de ahorcarla  [He tried to hung her] | Él le quemó a ella con un cigarro  He burnt her with a cigarette] |
| Él trató de asfixiarla  [He tried to choke her] | Él la insultó en público  [He insulted her in public] |
| Él usó un arma contra ella  [He used a gun against her] | Él la empujó contra una pared  [He shoved her against a wall] |
| Él le disparó con un arma a ella  [He shot a gun against her] | Él la amenazó con herirle  [He threatened her with hurting her] |

**Annex 2**

List of KDEF pictures used in the experiment:

| **Neutral** | | **Angry** | |
| --- | --- | --- | --- |
| AM01NES | BM19NES | BM01ANS | BM19ANS |
| BM02NES | AM21NES | AM02ANS | BM21ANS |
| BM03NES | AM22NES | AM03ANS | BM22ANS |
| AM05NES | BM23NES | BM05ANS | AM23ANS |
| BM06NES | BM24NES | AM06ANS | BM24ANS |
| AM07NES | BM25NES | BM07ANS | BM25ANS |
| BM08NES | BM26NES | AM08ANS | AM26ANS |
| BM09NES | AM27NES | AM09ANS | BM27ANS |
| AM10NES | AM28NES | AM10ANS | AM28ANS |
| AM12NES | BM29NES | BM12ANS | BM29ANS |
| BM13NES | AM30NES | BM13ANS | AM30ANS |
| BM15NES | BM31NES | AM15ANS | AM31ANS |
| AM16NES | BM32NES | BM16ANS | AM32ANS |
| AM17NES | AM34NES | BM17ANS | BM34ANS |
| AM18NES | AM35NES | BM18ANS | BM35ANS |
